# Supplementary material for: A pairwise radiomics algorithm - lesion pair relation estimation (PRE) model for distinguishing multiple primary lung cancer (MPLC) from intrapulmonary metastasis (IPM)
Source: Research Square preprint supplement (doi:10.21203/rs.3.rs-2216255/v1), 2022-11-15
Supplement: Supplementary file 1 [file 90dc70f3114146c32e5d6a6c.docx]

### Scan Protocol

Preoperative chest CT images of SYSUFH were obtained with multidetector CT scanners (Aquilion 64, Canon Medical Systems, Otawara, Japan) during inspiration in SYSUFH. Scan parameters: tube voltage of 120 kVp; maximum of 500 mA with automatic tube current modulation; reconstruction thickness of 1.0 mm or 1.25mm at the same increment. Iopromide (300 mg I/m1, Schering Pharmaceutical Ltd) was used as the contrast agent for enhanced scanning protocol, and 80-100 ml was injected at 3-4 ml/s flow rate.

Preoperative chest CT examinations of SYSUCC were obtained with a Discovery CT 750 HD (GE Medical Systems, Milwaukee, WI), Philips brilliance iCT 128 slice (Philips Medical Systems, Netherlands) CT system. The scan range was from pulmonary apex level to below the diaphragm. The scanning protocol was as follows: tube voltage 120 kVp with automatic tube current modulation. For GE CT systems, reconstructed slice thickness was 1.25 mm, pitch 0.984. For the Philips CT system, reconstructed slice thickness was 1.0 mm, pitch 0.98.
